# Supplementary material
Source: Royal Society of Chemistry journal article supplement (doi:10.1039/d6ta03022j)
Supplement: d6ta03022j1.pdf [file d6ta03022j1.pdf]

## Supplementary Information

### Engineering Cu-Ag Interfaces for Selective Acetate Production in CO<sub>2</sub> Electroreduction

Chayapat Thammaniphit<sup>1</sup>, Pongtanawat Khemthong<sup>2</sup>, Teera Butburee<sup>2</sup>, Jirapat Santatiwongchai<sup>2</sup>,  
Weradesh Sangkhun<sup>2</sup>, Kornkamon Meesombad<sup>2</sup>, Alexander Gonzalez<sup>3</sup>, Tobias Hanrath<sup>3</sup>,  
Pongkarn Chakthranont<sup>2\*</sup>, Rungthiwa Methaapanon<sup>1\*</sup>

<sup>1</sup>Centre of Excellence in Particle and Material Processing Technology, Department of Chemical Engineering, Faculty of Engineering, Chulalongkorn University, Bangkok, 10330, Thailand

<sup>2</sup>National Nanotechnology Center (NANOTEC), National Science and Technology Development Agency (NSTDA), Pathum Thani, 12120 Thailand

<sup>3</sup>Robert Frederick Smith School of Chemical and Biomolecular Engineering, Cornell University, Ithaca, NY 14853, USA

\*E-mail: [rungthiwa.m@chula.ac.th](mailto:rungthiwa.m@chula.ac.th), [pongkarn.cha@nanotec.or.th](mailto:pongkarn.cha@nanotec.or.th)

## Table of contents

|                                                                                                                                                                                                                                                                                                                                                                                         |    |
|-----------------------------------------------------------------------------------------------------------------------------------------------------------------------------------------------------------------------------------------------------------------------------------------------------------------------------------------------------------------------------------------|----|
| <b>Figure S1</b> (a) Cu and Ag targets for the co-sputtering method; (b) interior view of the sputtering chamber during deposition, showing the plasma glow.....                                                                                                                                                                                                                        | 3  |
| <b>Figure S2</b> (a) SEM image and (b) corresponding EDS elemental mapping of Cu <sub>40</sub> Ag <sub>60</sub> nanoparticle.....                                                                                                                                                                                                                                                       | 3  |
| <b>Figure S3</b> Cross-sectional SEM images of (a-d) the sputtered Cu-Ag catalysts, and (e) the entire GDE....                                                                                                                                                                                                                                                                          | 4  |
| <b>Figure S4</b> SEM-EDS images of Cu, Cu <sub>80</sub> Ag <sub>20</sub> , Cu <sub>60</sub> Ag <sub>40</sub> , Cu <sub>40</sub> Ag <sub>60</sub> , Cu <sub>20</sub> Ag <sub>80</sub> , and Ag catalysts, showing their surface morphologies and corresponding Cu:Ag elemental ratios as determined from EDS spectra...5                                                                 | 5  |
| <b>Figure S5</b> High-magnification SEM-EDS images of Cu, Cu <sub>80</sub> Ag <sub>20</sub> , Cu <sub>60</sub> Ag <sub>40</sub> , Cu <sub>40</sub> Ag <sub>60</sub> , Cu <sub>20</sub> Ag <sub>80</sub> , and Ag catalysts .....                                                                                                                                                        | 5  |
| <b>Figure S6</b> Atomic compositions of Cu, Cu <sub>80</sub> Ag <sub>20</sub> , Cu <sub>60</sub> Ag <sub>40</sub> , Cu <sub>40</sub> Ag <sub>60</sub> , Cu <sub>20</sub> Ag <sub>80</sub> , and Ag determined from SEM-EDS, showing a linear correlation between the nominal and measured compositions.....                                                                             | 6  |
| <b>Figure S7</b> Particle size distribution of Cu, Cu <sub>80</sub> Ag <sub>20</sub> , Cu <sub>60</sub> Ag <sub>40</sub> , Cu <sub>40</sub> Ag <sub>60</sub> , Cu <sub>20</sub> Ag <sub>80</sub> , and Ag measured from Figure 1 .....                                                                                                                                                  | 7  |
| <b>Figure S8</b> XRD peak deconvolution of the 2θ region of 36–46° for (a) Ag, (b) Cu <sub>20</sub> Ag <sub>80</sub> , (c) Cu <sub>40</sub> Ag <sub>60</sub> , (d) Cu <sub>60</sub> Ag <sub>40</sub> , (e) Cu <sub>80</sub> Ag <sub>20</sub> , and (f) Cu, resolving the overlapping contributions of Ag(111), Graphite, and Ag(200) reflections.....                                   | 8  |
| <b>Figure S9</b> Cu oxidation states obtained from (a) XPS and (b) linear combination fitting of XANES spectra for Cu <sub>100</sub> Ag <sub>0</sub> , Cu <sub>80</sub> Ag <sub>20</sub> , Cu <sub>60</sub> Ag <sub>40</sub> , Cu <sub>40</sub> Ag <sub>60</sub> , and Cu <sub>20</sub> Ag <sub>80</sub> catalyst.....                                                                  | 10 |
| <b>Figure S10</b> (a) Normalized Cu K-edge XANES spectra and (b) Cu oxidation states obtained from linear combination fitting of Cu <sub>40</sub> Ag <sub>60</sub> spectra before and after reaction.....                                                                                                                                                                               | 10 |
| <b>Figure S11</b> CV scans showing capacitive current measurements for (a) Cu <sub>100</sub> Ag <sub>0</sub> , (b) Cu <sub>80</sub> Ag <sub>20</sub> , (c) Cu <sub>60</sub> Ag <sub>40</sub> , (d) Cu <sub>40</sub> Ag <sub>60</sub> , (e) Cu <sub>20</sub> Ag <sub>80</sub> , and (f) Cu <sub>100</sub> Ag <sub>0</sub> catalysts at scan rates from 5 to 100 mV s <sup>-1</sup> ..... | 12 |
| <b>Figure S12</b> Current density profiles of Cu, Cu <sub>80</sub> Ag <sub>20</sub> , Cu <sub>60</sub> Ag <sub>40</sub> , Cu <sub>40</sub> Ag <sub>60</sub> , Cu <sub>20</sub> Ag <sub>80</sub> , and Ag catalysts measured at potentials of -0.5, -0.55, -0.6, and -0.7 V vs. RHE. ....                                                                                                | 13 |

|                                                                                                                                                                                                                                                                                                                                                                   |    |
|-------------------------------------------------------------------------------------------------------------------------------------------------------------------------------------------------------------------------------------------------------------------------------------------------------------------------------------------------------------------|----|
| <b>Figure S13</b> LSV profiles of Cu-Ag catalysts measured under N <sub>2</sub> atmosphere for HER activity evaluation.<br>.....                                                                                                                                                                                                                                  | 14 |
| <b>Figure S14</b> comparison of CO <sub>2</sub> RR product distributions between Cu/Ag nanoparticles (Cu: Ag = 40:60 at%) and a sputtered Cu <sub>40</sub> Ag <sub>60</sub> alloy catalyst at -0.60 V vs. RHE. <b>(b)</b> Potential-dependent CO <sub>2</sub> RR product distributions of Cu/Ag nanoparticles measured at -0.50, -0.55, and -0.60 V vs. RHE. .... | 15 |
| <b>Figure S15</b> SEM images of (a) as-prepared Cu <sub>40</sub> Ag <sub>60</sub> and (b) Cu <sub>40</sub> Ag <sub>60</sub> after the stability test .....                                                                                                                                                                                                        | 15 |
| <b>Figure S16</b> CV scans showing (a) capacitive current measurements for Cu <sub>40</sub> Ag <sub>60</sub> before and after stability test and (b) double-layer capacitance (C <sub>dl</sub> ) values .....                                                                                                                                                     | 16 |
| <b>Figure S17</b> water contact angles of Cu, Ag and Cu-Ag alloy .....                                                                                                                                                                                                                                                                                            | 16 |
| <b>Figure S18</b> Water contact angles of Cu <sub>40</sub> Ag <sub>60</sub> alloy before and after stability test. ....                                                                                                                                                                                                                                           | 17 |
| <b>Figure S19</b> Post-reaction (a) SEM and (b) EDS mapping images of Cu <sub>40</sub> Ag <sub>60</sub> after the stability test, showing residual electrolyte salt on the catalyst surface. ....                                                                                                                                                                 | 17 |
| <b>Figure S20</b> Faradaic efficiencies of major CO <sub>2</sub> RR products over Cu, Cu <sub>80</sub> Ag <sub>20</sub> , Cu <sub>60</sub> Ag <sub>40</sub> , Cu <sub>40</sub> Ag <sub>60</sub> , and Cu <sub>20</sub> Ag <sub>80</sub> catalysts at applied potentials of -0.5 V (red), -0.55 V (yellow), -0.6 V (purple), and -0.7 V (green) vs. RHE. ....      | 18 |
| <br>                                                                                                                                                                                                                                                                                                                                                              |    |
| <b>Table S1</b> Reported CO <sub>2</sub> RR performances of Cu-base catalysts to produce acetate from the literature. ....                                                                                                                                                                                                                                        | 1  |
| <b>Table S2</b> Reported CO <sub>2</sub> RR performances of Cu-Ag catalysts from the literature. ....                                                                                                                                                                                                                                                             | 2  |
| <b>Table S3</b> Atomic compositions of Cu, Cu <sub>80</sub> Ag <sub>20</sub> , Cu <sub>60</sub> Ag <sub>40</sub> , Cu <sub>40</sub> Ag <sub>60</sub> , Cu <sub>20</sub> Ag <sub>80</sub> , and Ag determined from SEM-EDS .....                                                                                                                                   | 6  |
| <b>Table S4</b> Peak positions (2θ), FWHM, and crystallite sizes obtained from Lorentzian fitting of Cu, Ag, and Cu-Ag alloy reflections, together with graphite-related peaks, in the 2θ range of 36-46°. ....                                                                                                                                                   | 9  |
| <b>Table S5</b> EXAFS fitting parameters at the Cu K-edge for sputtered Cu-Ag catalysts.....                                                                                                                                                                                                                                                                      | 11 |
| <b>Table S6</b> Relative molar fraction of acetate in liquid products (FE/n). ....                                                                                                                                                                                                                                                                                | 14 |

## Activity comparison

**Table S1** Reported CO<sub>2</sub>RR performances of Cu-base catalysts to produce acetate from the literature.

| Catalyst                          | Acetate (%FE) | current density (mA cm <sup>-2</sup> ) | Potential (V vs. RHE) | electrolyte                                   | Electrolytic cell | Ref. |
|-----------------------------------|---------------|----------------------------------------|-----------------------|-----------------------------------------------|-------------------|------|
| Cu <sub>2</sub> O-Cu <sup>0</sup> | 76            | 0.46                                   | -0.4                  | 0.3M KHCO <sub>3</sub>                        | H-cell            | [1]  |
| Cu-Cu <sub>2</sub> O-2            | 48            | 11.5                                   | -0.4                  | 0.1M KCl                                      | H-cell            | [2]  |
| PcCu-TFPN                         | 90.3          | 12.5                                   | -0.8                  | 0.1M KHCO <sub>3</sub>                        | Flow cell         | [3]  |
| Co-corrole                        | 13            | 2.9                                    | -0.955                | 0.1M NaClO <sub>4</sub> with phosphate buffer | H-cell            | [4]  |
| NDD/Si RA                         | 77.3          | ~1                                     | -0.8                  | 0.5M NaHCO <sub>3</sub>                       | H-cell            | [5]  |
| Cu-CuI                            | <5            | 894                                    | -1.0                  | 1M KOH                                        | Flow cell         | [6]  |

**Table S2** Reported CO<sub>2</sub>RR performances of Cu-Ag catalysts from the literature.

| Catalyst                     | Ag (%mol) | current density (mA cm <sup>-2</sup> ) | H <sub>2</sub> (%FE) | CO (%FE)    | EtOH (%FE) | C <sub>2</sub> H <sub>4</sub> (%FE) | Acetate (%FE) | Potential (V vs. RHE) | electrolyte             | Electrolytic cell | Ref.             |
|------------------------------|-----------|----------------------------------------|----------------------|-------------|------------|-------------------------------------|---------------|-----------------------|-------------------------|-------------------|------------------|
| Ag Core-Cu shell             | 96.7      | 320                                    | ~10                  | ~10         | 52.6       | 27.7                                | ~1            | -1                    | 3 M KOH                 | Flow-cell         | [7]              |
| Cu NWs + Ag Particle         | 95.2      | 25.1                                   | ~20                  | ~18         | 16.5       | 14.9                                | 3.4           | -1.1                  | 0.1 M KHCO <sub>3</sub> | H-cell            | [8]              |
| Cu-Ag alloy nanorods         | 54.5      | 213.3                                  | 17                   | 28.9        | 18.5       | 24.1                                | 5.3           | -1                    | 1 M KOH                 | Flow-cell         | [9]              |
| Cu-Ag tandem                 | 54        | 320                                    | ~11                  | ~15         | 10.5       | 13                                  | 17            | -0.7                  | 1 M KOH                 | Flow-cell         | [10]             |
| Cu-Ag tandem                 | 46.9      | 2.5                                    | ~25                  | ~20         | 22.5       | 16.8                                | 2.2           | -1.2                  | 0.1 M KHCO <sub>3</sub> | H-cell            | [11]             |
| Cu-Ag alloy                  | 33        | 40                                     | 12                   | 0.8         | 17         | 1.5                                 | 0             | -0.95                 | 0.5 M KHCO <sub>3</sub> | H-cell            | [12]             |
| Atomic Cu-Ag pairs           | 30        | 6.6                                    | 18                   | 17          | 13         | -                                   | 50            | -0.5                  | 0.1M KHCO <sub>3</sub>  | H-cell            | [13]             |
| Cu-Ag nanowires              | 18        | 2.5                                    | 12.8                 | 53.21       | 3.07       | 19.5                                | 1.15          | -1.17                 | 0.1M KHCO <sub>3</sub>  | H-cell            | [14]             |
| Cu-Ag alloy                  | 16        | 5                                      | 25                   | 10          | 15         | 12                                  | 0             | -0.9                  | 0.5 M KHCO <sub>3</sub> | H-cell            | [15]             |
| Cu-Ag alloy film             | 14        | 250                                    | 7                    | 5           | 40         | 30                                  | 12            | -0.67                 | 1 M KOH                 | Flow-cell         | [16]             |
| Cu-Ag tandem                 | 12        | -                                      | ~20                  | ~30         | -          | 4                                   | 0             | -1.17                 | 0.1 MKHCO <sub>3</sub>  | H-cell            | [17]             |
| Cu-Ag alloy                  | 10        | 50                                     | ~25                  | ~48         | 7          | 15                                  | 2             | -0.85                 | 1 M KOH                 | Flow-cell         | [18]             |
| Cu-Ag Janus                  | 3.48      | ~35                                    | ~18                  | ~7          | 19.8       | ~50                                 | 0             | -1.2                  | 0.1M KHCO <sub>3</sub>  | H-cell            | [19]             |
| Ag Core-Cu shell             | 1.74      | 300                                    | 10                   | 15          | 23.2       | 43.9                                | 5.9           | -1.6                  | 1M KHCO <sub>3</sub>    | Flow-cell         | [20]             |
| <b>Nanoscale Cu-Ag alloy</b> | <b>60</b> | <b>320</b>                             | <b>12.3</b>          | <b>32.9</b> | <b>9.1</b> | <b>6</b>                            | <b>31.1</b>   | <b>-0.6</b>           | <b>1 M KOH</b>          | <b>Flow cell</b>  | <b>This work</b> |

## Catalyst synthesis & characterizations

Deposition of Cu, Ag, and Cu-Ag thin films by magnetron sputtering

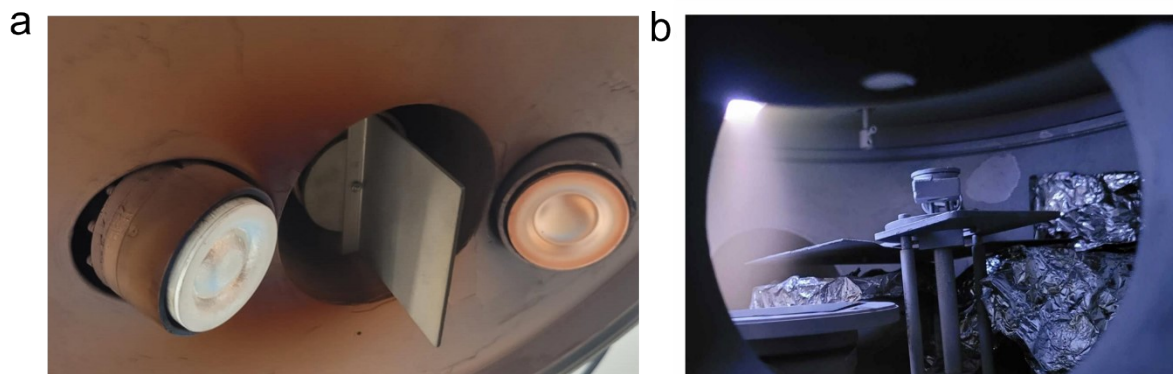

**Figure S1** (a) Cu and Ag targets for the co-sputtering method; (b) interior view of the sputtering chamber during deposition, showing the plasma glow.

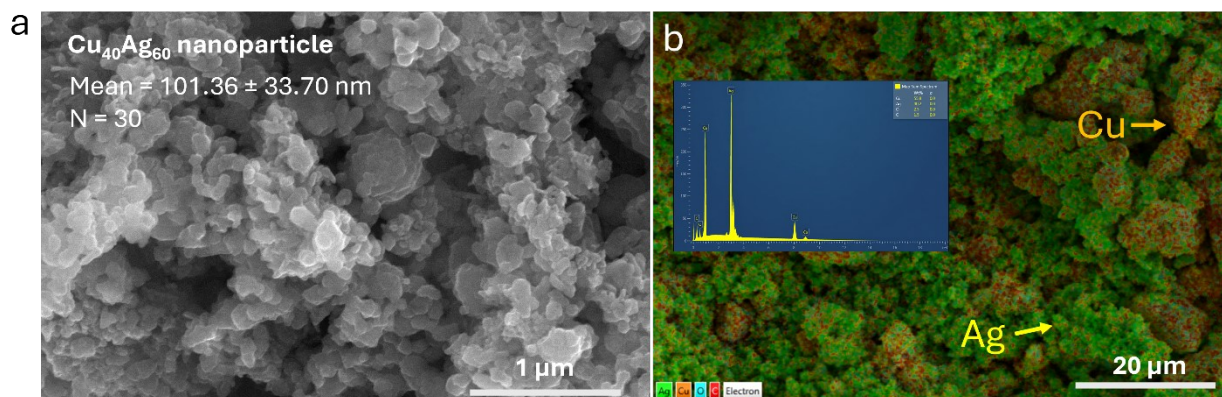

**Figure S2** (a) SEM image and (b) corresponding EDS elemental mapping of  $\text{Cu}_{40}\text{Ag}_{60}$  nanoparticle.

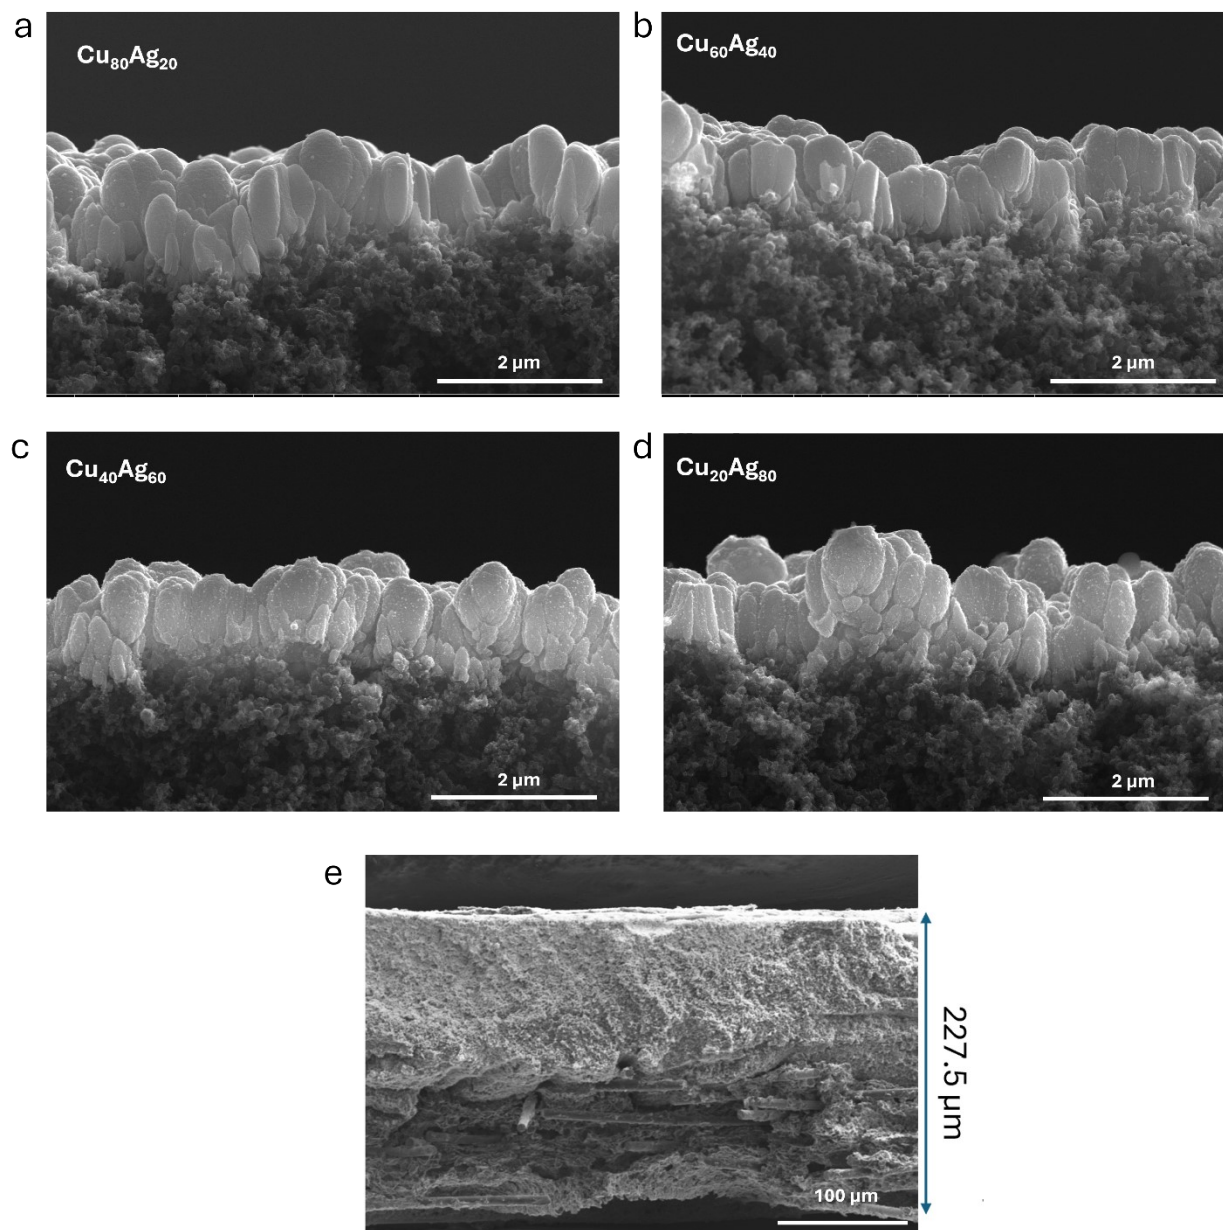

**Figure S3** Cross-sectional SEM images of (a-d) the sputtered Cu-Ag catalysts, and (e) the entire GDE.

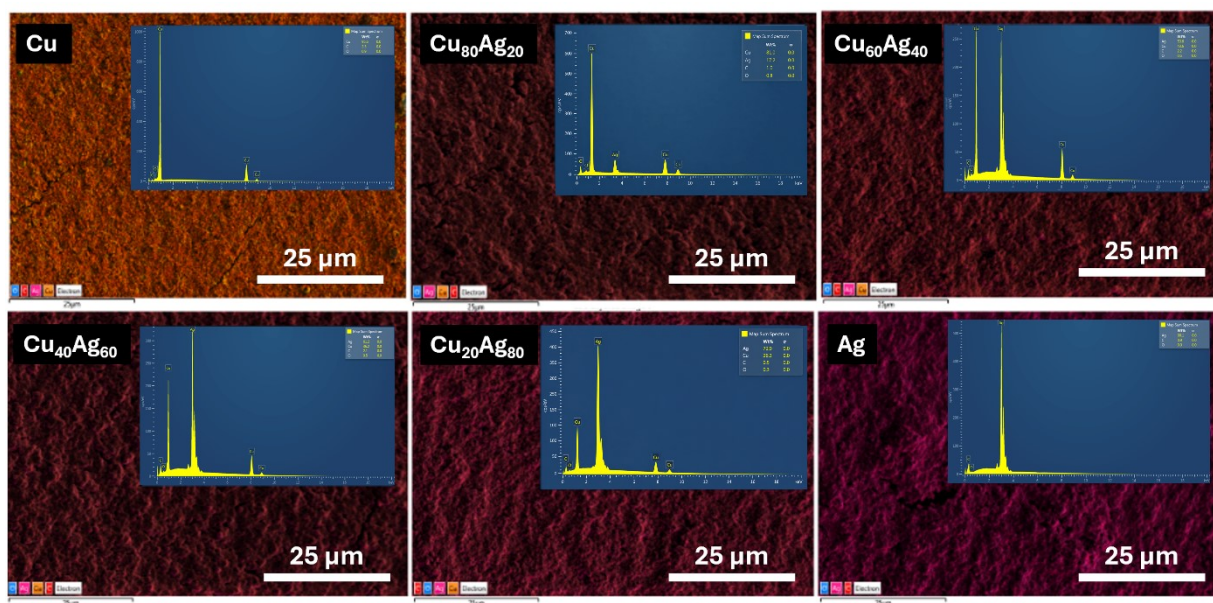

**Figure S4** SEM-EDS images of Cu, Cu<sub>80</sub>Ag<sub>20</sub>, Cu<sub>60</sub>Ag<sub>40</sub>, Cu<sub>40</sub>Ag<sub>60</sub>, Cu<sub>20</sub>Ag<sub>80</sub>, and Ag catalysts, showing their surface morphologies and corresponding Cu:Ag elemental ratios as determined from EDS spectra.

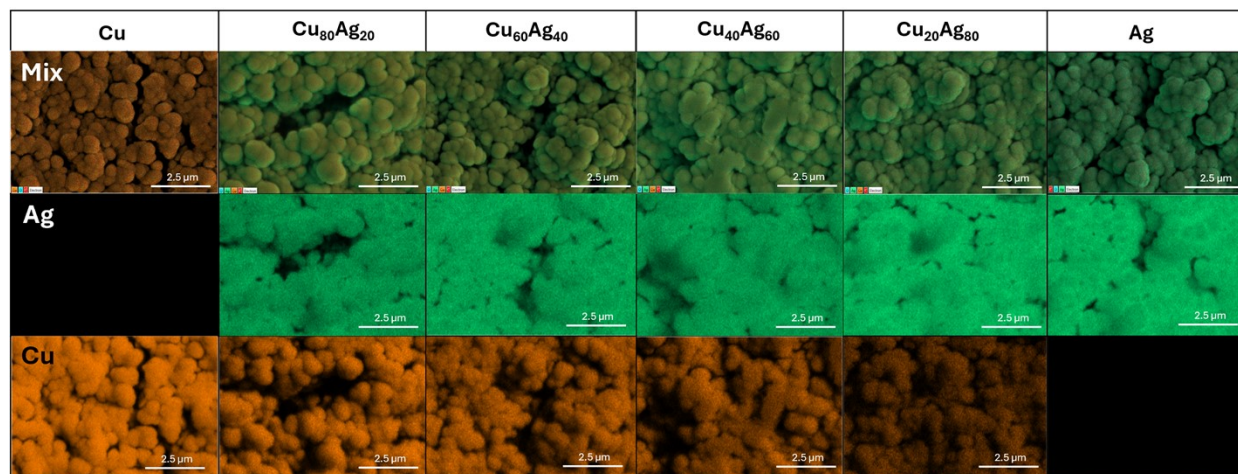

**Figure S5** High-magnification SEM-EDS images of Cu, Cu<sub>80</sub>Ag<sub>20</sub>, Cu<sub>60</sub>Ag<sub>40</sub>, Cu<sub>40</sub>Ag<sub>60</sub>, Cu<sub>20</sub>Ag<sub>80</sub>, and Ag catalysts

**Table S3** Atomic compositions of Cu, Cu<sub>80</sub>Ag<sub>20</sub>, Cu<sub>60</sub>Ag<sub>40</sub>, Cu<sub>40</sub>Ag<sub>60</sub>, Cu<sub>20</sub>Ag<sub>80</sub>, and Ag determined from SEM-EDS

| Catalyst<br>Element | Cu  | Cu <sub>80</sub> Ag <sub>20</sub> | Cu <sub>60</sub> Ag <sub>40</sub> | Cu <sub>40</sub> Ag <sub>60</sub> | Cu <sub>20</sub> Ag <sub>80</sub> | Ag  |
|---------------------|-----|-----------------------------------|-----------------------------------|-----------------------------------|-----------------------------------|-----|
| Cu (%atomic)        | 100 | 82.5±1.0                          | 64.3±1.4                          | 38.8±1.6                          | 23.0±1.1                          | 0   |
| Ag (%atomic)        | 0   | 17.5±1.0                          | 35.7±1.6                          | 61.2±1.1                          | 77±1.3                            | 100 |

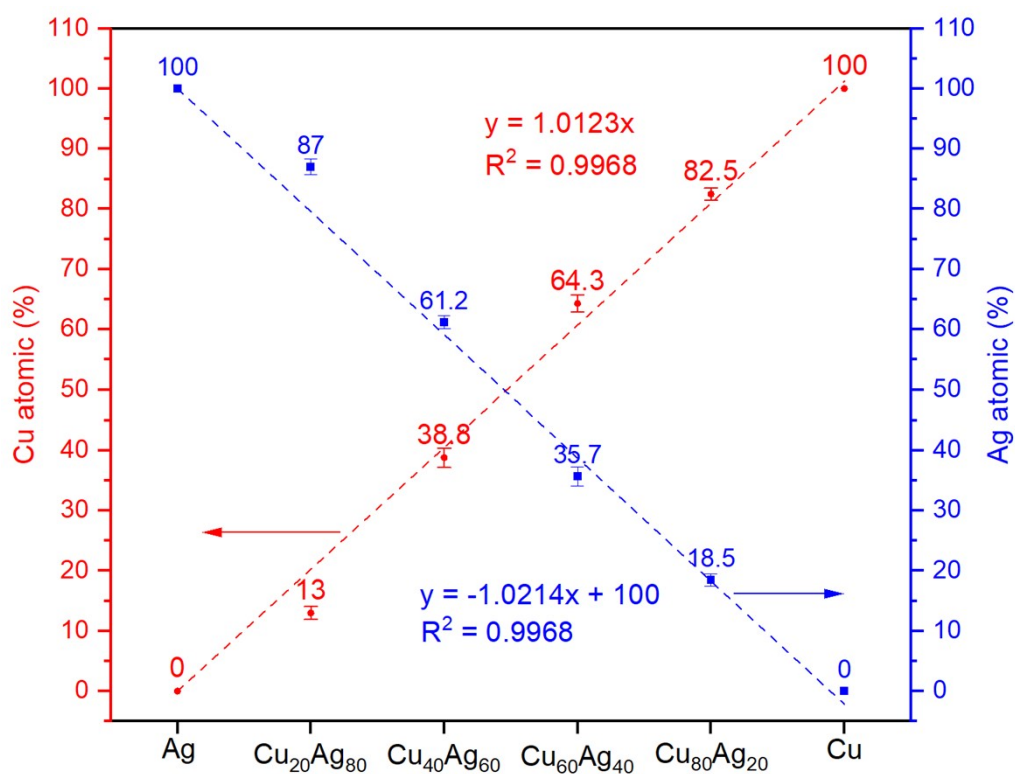

**Figure S6** Atomic compositions of Cu, Cu<sub>80</sub>Ag<sub>20</sub>, Cu<sub>60</sub>Ag<sub>40</sub>, Cu<sub>40</sub>Ag<sub>60</sub>, Cu<sub>20</sub>Ag<sub>80</sub>, and Ag determined from SEM-EDS, showing a linear correlation between the nominal and measured compositions.

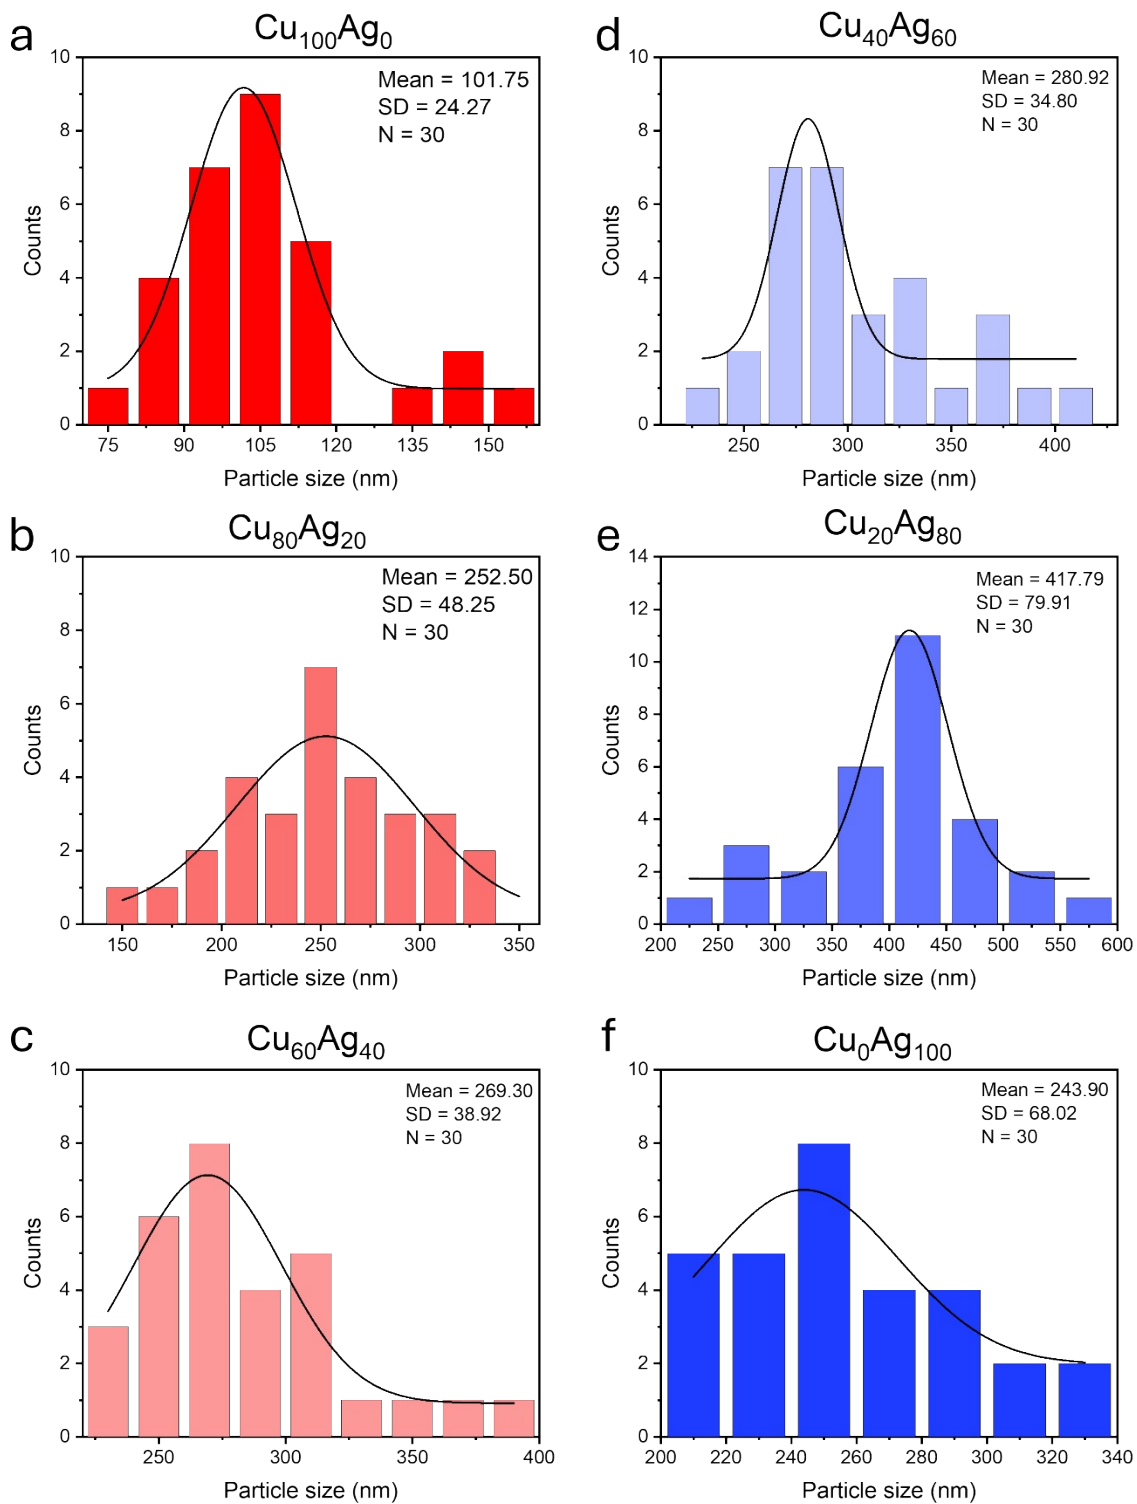

**Figure S7** Particle size distribution of Cu,  $\text{Cu}_{80}\text{Ag}_{20}$ ,  $\text{Cu}_{60}\text{Ag}_{40}$ ,  $\text{Cu}_{40}\text{Ag}_{60}$ ,  $\text{Cu}_{20}\text{Ag}_{80}$ , and Ag measured from Figure 1

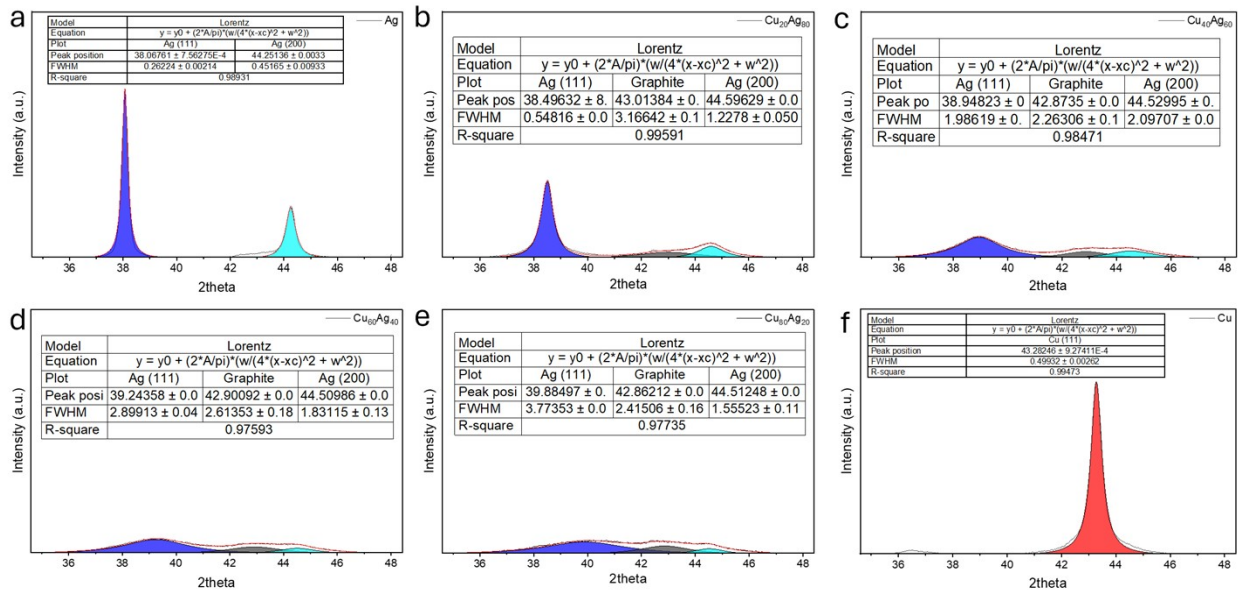

**Figure S8** XRD peak deconvolution of the  $2\theta$  region of  $36\text{--}46^\circ$  for (a) Ag, (b)  $\text{Cu}_{20}\text{Ag}_{80}$ , (c)  $\text{Cu}_{40}\text{Ag}_{60}$ , (d)  $\text{Cu}_{60}\text{Ag}_{40}$ , (e)  $\text{Cu}_{80}\text{Ag}_{20}$ , and (f) Cu, resolving the overlapping contributions of Ag(111), Graphite, and Ag(200) reflections.

**Table S4** Peak positions ( $2\theta$ ), FWHM, and crystallite sizes obtained from Lorentzian fitting of Cu, Ag, and Cu-Ag alloy reflections, together with graphite-related peaks, in the  $2\theta$  range of 36-46°.

| <b>Composition</b>                | <b>Peak</b> | <b><math>2\theta</math> (°)</b> | <b>FWHM (°)</b> | <b>Crystallite size D (nm)</b> |
|-----------------------------------|-------------|---------------------------------|-----------------|--------------------------------|
| Cu                                | Cu(111)     | 43.28246                        | 0.49932         | 17.12                          |
| Cu <sub>80</sub> Ag <sub>20</sub> | Graphite    | 42.86212                        | 2.41506         | 3.53                           |
|                                   | (111)       | 39.88497                        | 3.77353         | 2.24                           |
|                                   | (200)       | 44.51248                        | 1.55523         | 5.52                           |
| Cu <sub>60</sub> Ag <sub>40</sub> | Graphite    | 42.90092                        | 2.61353         | 3.27                           |
|                                   | (111)       | 39.24358                        | 2.89913         | 2.91                           |
|                                   | (200)       | 44.50986                        | 1.83115         | 4.69                           |
| Cu <sub>40</sub> Ag <sub>60</sub> | Graphite    | 42.87350                        | 2.26306         | 3.77                           |
|                                   | (111)       | 38.94823                        | 1.98619         | 4.24                           |
|                                   | (200)       | 44.52995                        | 2.09707         | 4.09                           |
| Cu <sub>20</sub> Ag <sub>80</sub> | Graphite    | 43.01384                        | 3.16642         | 2.70                           |
|                                   | (111)       | 38.49632                        | 0.54816         | 15.35                          |
|                                   | (200)       | 44.59629                        | 1.22780         | 6.99                           |
| Ag                                | Ag(111)     | 38.06761                        | 0.26224         | 32.05                          |
|                                   | Ag(200)     | 44.25136                        | 0.45165         | 18.99                          |

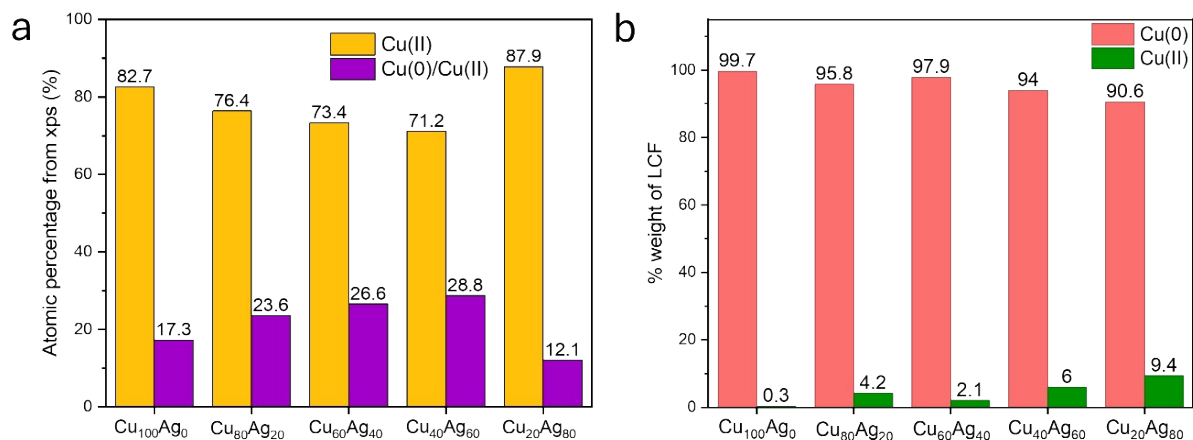

**Figure S9** Cu oxidation states obtained from (a) XPS and (b) linear combination fitting of XANES spectra for Cu<sub>100</sub>Ag<sub>0</sub>, Cu<sub>80</sub>Ag<sub>20</sub>, Cu<sub>60</sub>Ag<sub>40</sub>, Cu<sub>40</sub>Ag<sub>60</sub>, and Cu<sub>20</sub>Ag<sub>80</sub> catalyst.

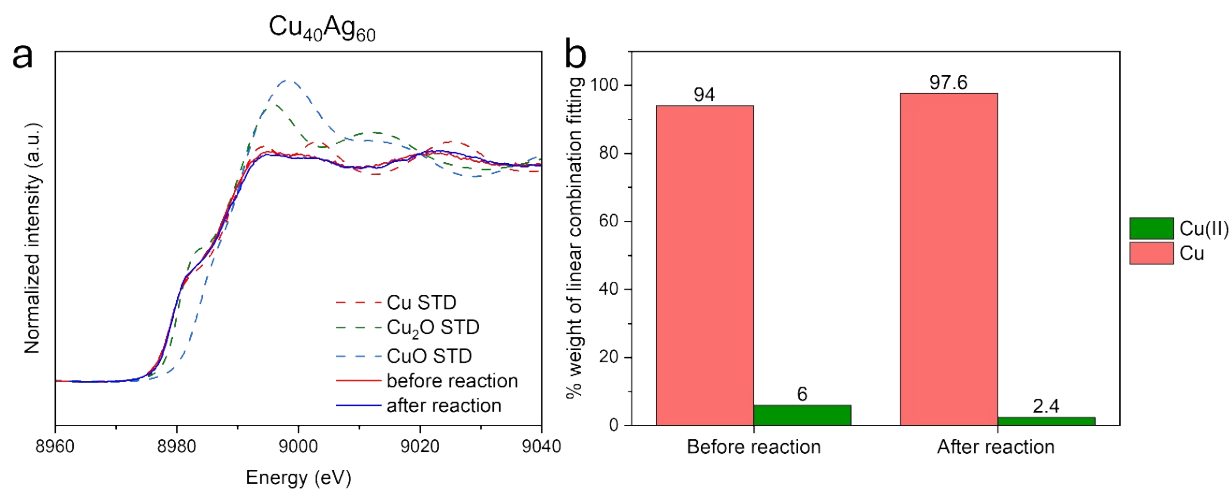

**Figure S10** (a) Normalized Cu K-edge XANES spectra and (b) Cu oxidation states obtained from linear combination fitting of Cu<sub>40</sub>Ag<sub>60</sub> spectra before and after reaction.

**Table S5** EXAFS fitting parameters at the Cu K-edge for sputtered Cu-Ag catalysts.

| <b>Catalyst information</b>           | <b>Path</b>        | <b>CN</b>   | <b><math>\sigma^2</math> (<math>\text{\AA}^{-2}</math>)</b> | <b>R (<math>\text{\AA}</math>)</b> | <b><math>E_0</math></b> |
|---------------------------------------|--------------------|-------------|-------------------------------------------------------------|------------------------------------|-------------------------|
| <b>Cu<sub>20</sub>Ag<sub>80</sub></b> | Cu-Cu <sub>1</sub> | 6.02 ± 0.15 | 0.017 ± 0.002                                               | 2.51 ± 0.008                       | -0.95 ± 1.07            |
|                                       | Cu-Ag <sub>1</sub> | 2.01 ± 0.15 | 0.007 ± 0.001                                               | 2.66 ± 0.009                       |                         |
|                                       | Cu-Cu <sub>2</sub> | 1.00 ± 0.15 | 0.007 ± 0.002                                               | 3.06 ± 0.023                       |                         |
|                                       | Cu-Cu <sub>3</sub> | 2.01 ± 0.15 | 0.018 ± 0.009                                               | 4.03 ± 0.064                       |                         |
| <b>Cu<sub>40</sub>Ag<sub>60</sub></b> | Cu-Cu <sub>1</sub> | 5.54 ± 0.12 | 0.011 ± 0.001                                               | 2.51 ± 0.008                       | 1.05 ± 1.25             |
|                                       | Cu-Ag <sub>1</sub> | 1.85 ± 0.12 | 0.021 ± 0.004                                               | 2.68 ± 0.023                       |                         |
|                                       | Cu-Cu <sub>2</sub> | 0.92 ± 0.12 | 0.009 ± 0.005                                               | 3.55 ± 0.046                       |                         |
|                                       | Cu-Cu <sub>3</sub> | 1.85 ± 0.12 | 0.011 ± 0.004                                               | 4.01 ± 0.036                       |                         |
| <b>Cu<sub>60</sub>Ag<sub>40</sub></b> | Cu-Cu <sub>1</sub> | 5.48 ± 0.14 | 0.001 ± 0.001                                               | 2.53 ± 0.011                       | 4.20 ± 1.67             |
|                                       | Cu-Ag <sub>1</sub> | 1.83 ± 0.14 | 0.022 ± 0.007                                               | 2.77 ± 0.032                       |                         |
|                                       | Cu-Cu <sub>2</sub> | 0.91 ± 0.14 | 0.007 ± 0.005                                               | 3.54 ± 0.043                       |                         |
|                                       | Cu-Cu <sub>3</sub> | 1.83 ± 0.14 | 0.006 ± 0.003                                               | 4.03 ± 0.027                       |                         |
| <b>Cu<sub>80</sub>Ag<sub>20</sub></b> | Cu-Cu <sub>1</sub> | 8.34 ± 0.15 | 0.014 ± 0.002                                               | 2.55 ± 0.011                       | 3.98 ± 1.35             |
|                                       | Cu-Ag <sub>1</sub> | 1.67 ± 0.15 | 0.008 ± 0.002                                               | 2.68 ± 0.017                       |                         |
|                                       | Cu-Cu <sub>2</sub> | 3.34 ± 0.15 | 0.015 ± 0.003                                               | 3.09 ± 0.025                       |                         |
|                                       | Cu-Cu <sub>3</sub> | 1.67 ± 0.15 | 0.005 ± 0.003                                               | 4.05 ± 0.025                       |                         |

## Electrochemical testings

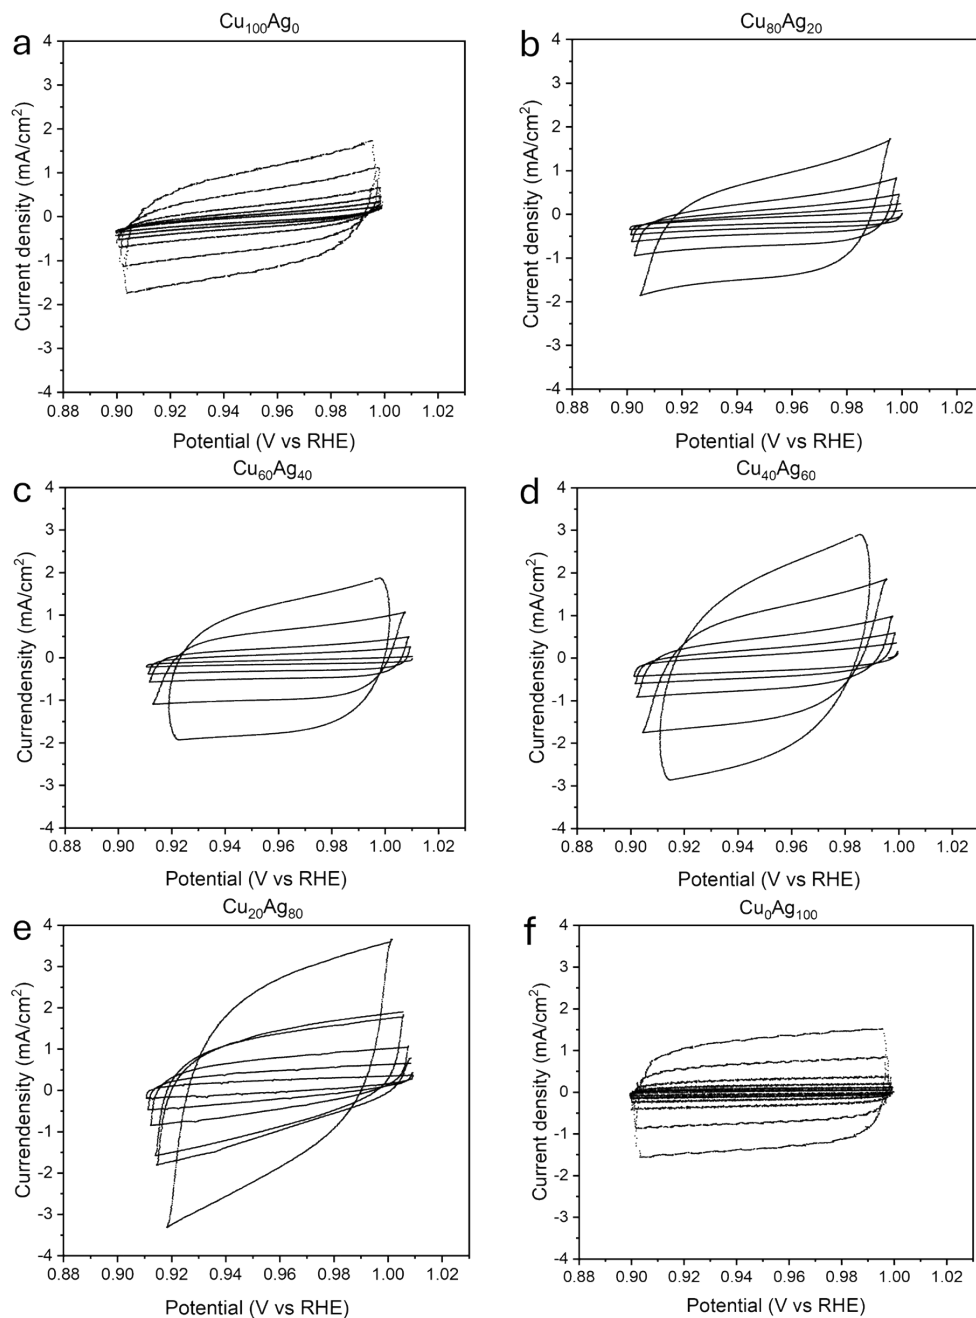

**Figure S11** CV scans showing capacitive current measurements for (a) Cu<sub>100</sub>Ag<sub>0</sub>, (b) Cu<sub>80</sub>Ag<sub>20</sub>, (c) Cu<sub>60</sub>Ag<sub>40</sub>, (d) Cu<sub>40</sub>Ag<sub>60</sub>, (e) Cu<sub>20</sub>Ag<sub>80</sub>, and (f) Cu<sub>100</sub>Ag<sub>0</sub> catalysts at scan rates from 5 to 100 mV s<sup>-1</sup>

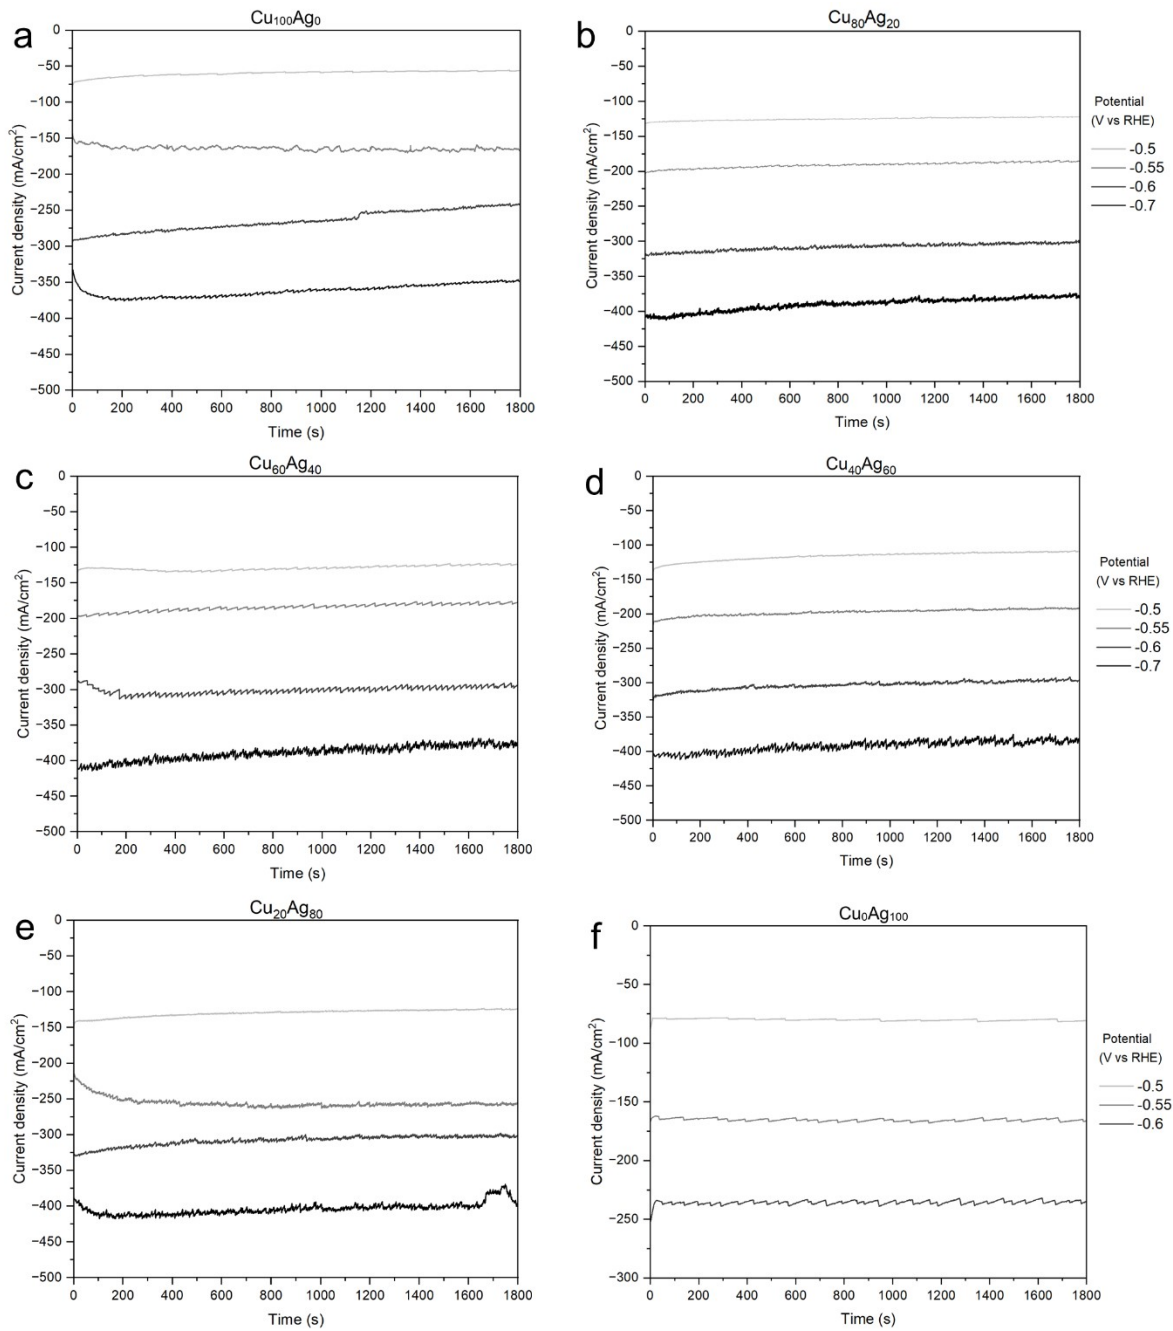

**Figure S12** Current density profiles of Cu, Cu<sub>80</sub>Ag<sub>20</sub>, Cu<sub>60</sub>Ag<sub>40</sub>, Cu<sub>40</sub>Ag<sub>60</sub>, Cu<sub>20</sub>Ag<sub>80</sub>, and Ag catalysts measured at potentials of -0.5, -0.55, -0.6, and -0.7 V vs. RHE.

**Table S6** Relative molar fraction of acetate in liquid products (FE/n).

| Liquid product                    | HCOO <sup>-</sup> | CH <sub>3</sub> COO <sup>-</sup> | EtOH  | PrOH | mol% of acetate in liquid products |
|-----------------------------------|-------------------|----------------------------------|-------|------|------------------------------------|
| n                                 | 2                 | 8                                | 12    | 18   |                                    |
| Cu <sub>100</sub> Ag <sub>0</sub> | 4.00              | 1.00                             | 33.00 | 5.00 | 2.43                               |
| Cu <sub>80</sub> Ag <sub>20</sub> | 5.10              | 14.30                            | 28.40 | 1.50 | 26.34                              |
| Cu <sub>60</sub> Ag <sub>40</sub> | 4.71              | 13.53                            | 29.42 | 0.00 | 26.03                              |
| Cu <sub>40</sub> Ag <sub>60</sub> | 3.68              | 31.12                            | 9.09  | 0.00 | 59.99                              |
| Cu <sub>20</sub> Ag <sub>80</sub> | 9.95              | 23.17                            | 12.89 | 0.00 | 32.37                              |

The mol% of acetate in the liquid products was calculated using the following equation:

$$\frac{\%FE_{acetate}/n_{acetate}}{\sum \%FE_i/n_i}$$

where i represents each liquid product and n is the number of electrons involved in the formation of the corresponding product.

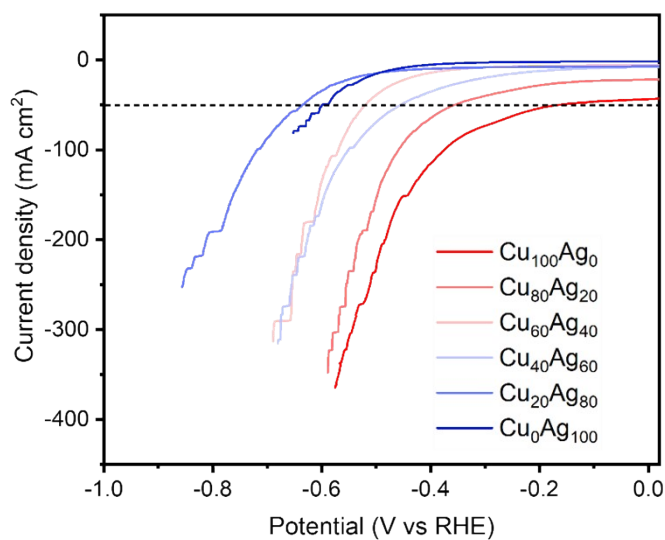

**Figure S13** LSV profiles of Cu-Ag catalysts measured under N<sub>2</sub> atmosphere for HER activity evaluation.

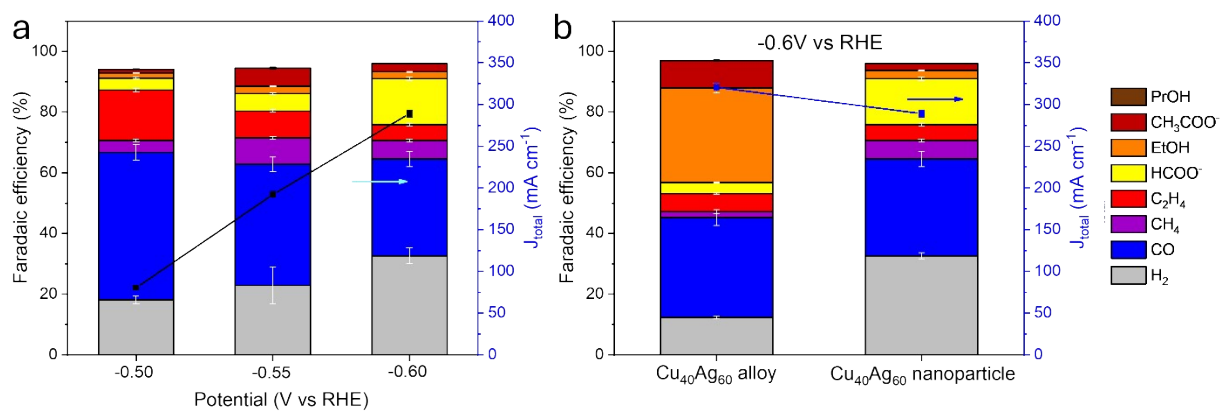

**Figure S14** comparison of CO<sub>2</sub>RR product distributions between Cu/Ag nanoparticles (Cu: Ag = 40:60 at%) and a sputtered Cu<sub>40</sub>Ag<sub>60</sub> alloy catalyst at -0.60 V vs. RHE. **(b)** Potential-dependent CO<sub>2</sub>RR product distributions of Cu/Ag nanoparticles measured at -0.50, -0.55, and -0.60 V vs. RHE.

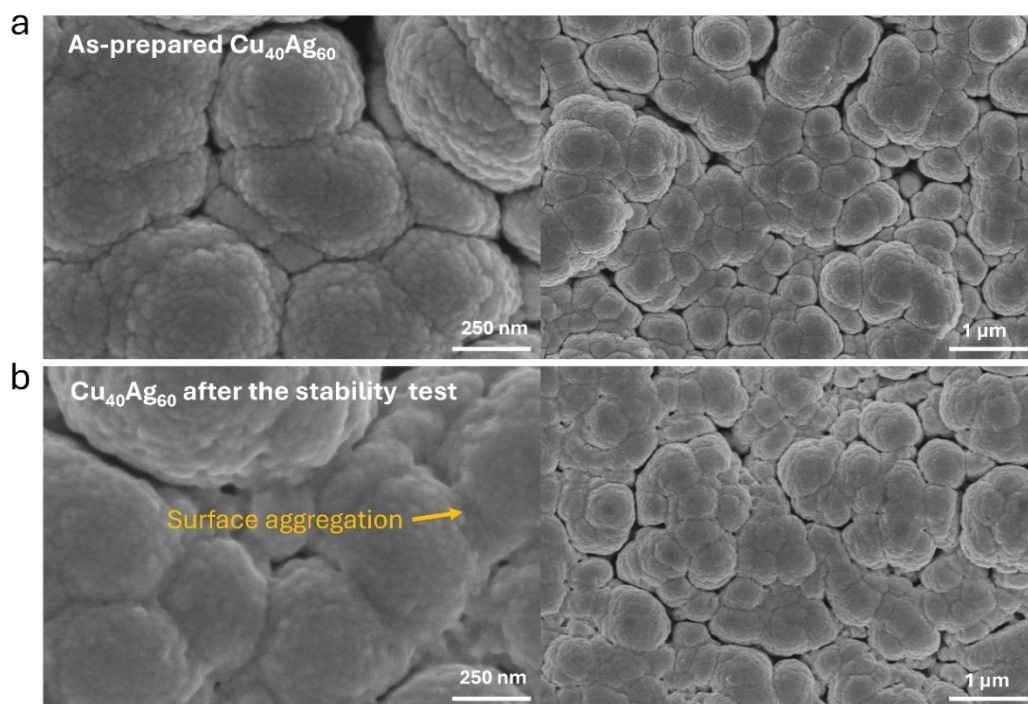

**Figure S15** SEM images of (a) as-prepared Cu<sub>40</sub>Ag<sub>60</sub> and (b) Cu<sub>40</sub>Ag<sub>60</sub> after the stability test

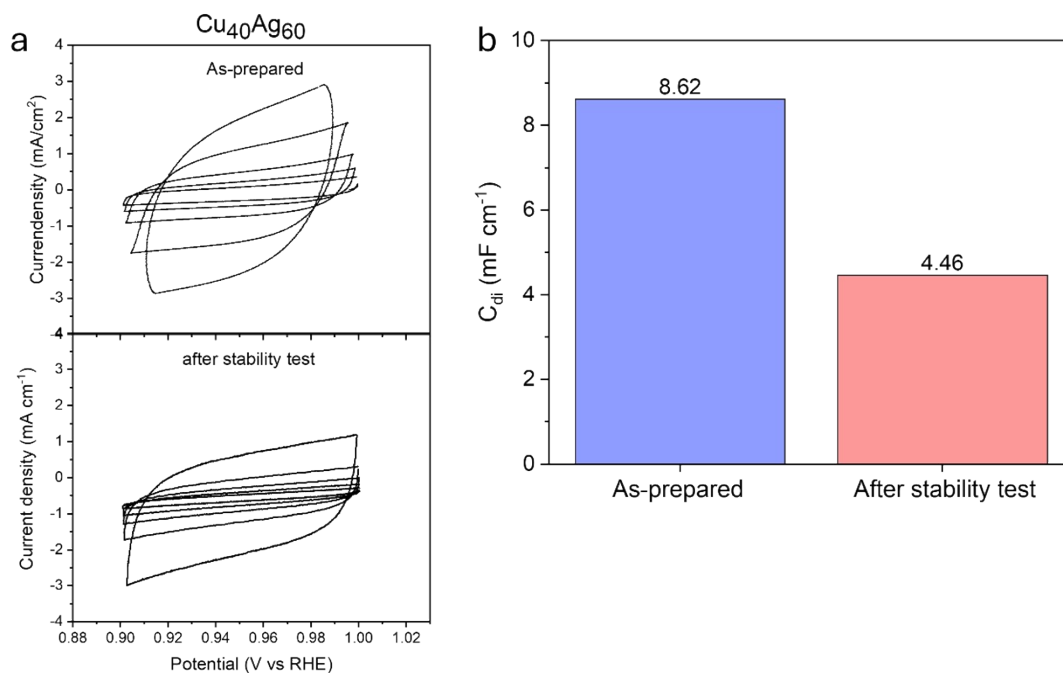

**Figure S16** CV scans showing (a) capacitive current measurements for  $\text{Cu}_{40}\text{Ag}_{60}$  before and after stability test and (b) double-layer capacitance ( $C_{dl}$ ) values

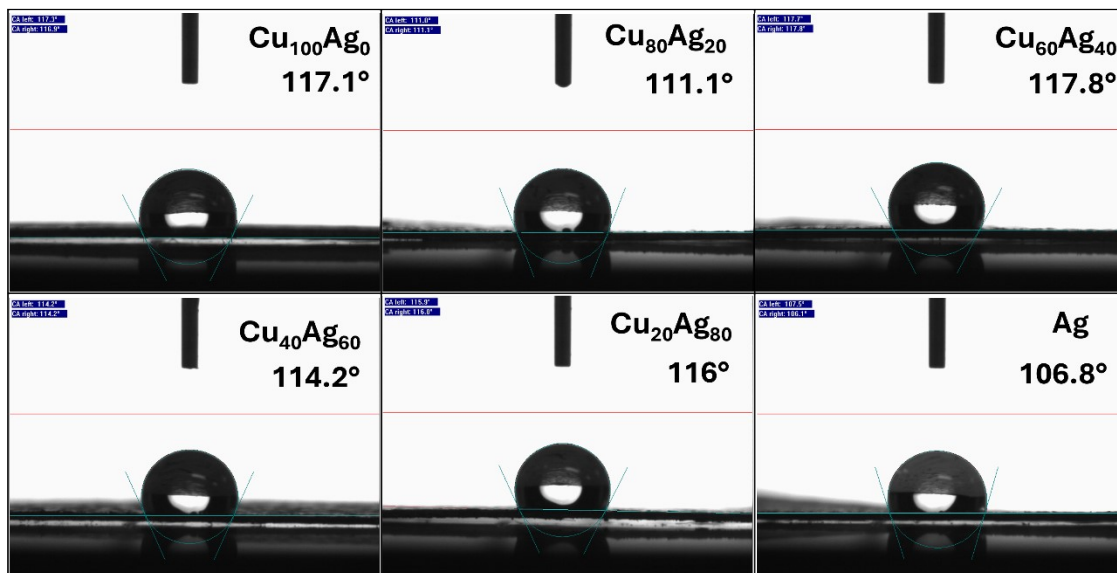

**Figure S17** water contact angles of Cu, Ag and Cu-Ag alloy

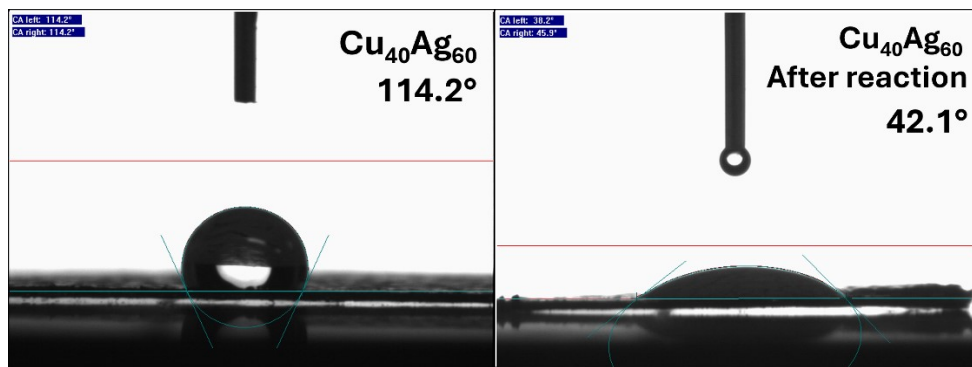

**Figure S18** Water contact angles of  $\text{Cu}_{40}\text{Ag}_{60}$  alloy before and after stability test.

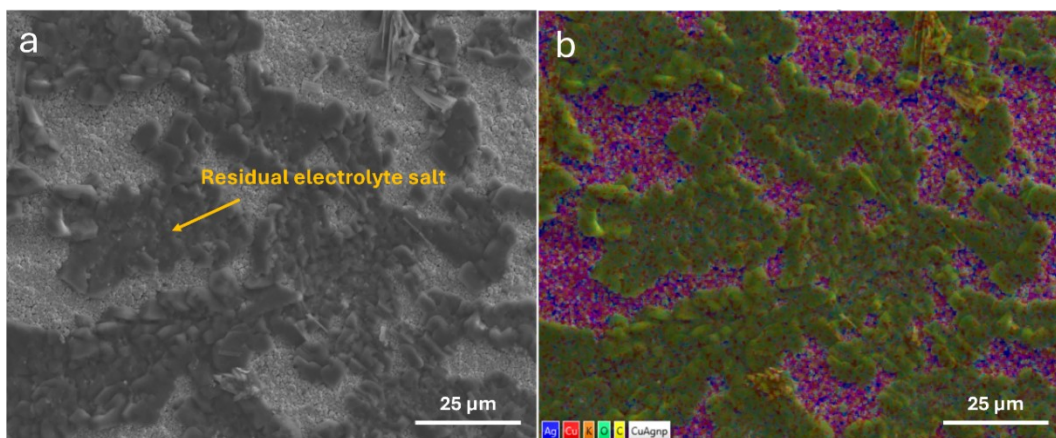

**Figure S19** Post-reaction (a) SEM and (b) EDS mapping images of  $\text{Cu}_{40}\text{Ag}_{60}$  after the stability test, showing residual electrolyte salt on the catalyst surface.

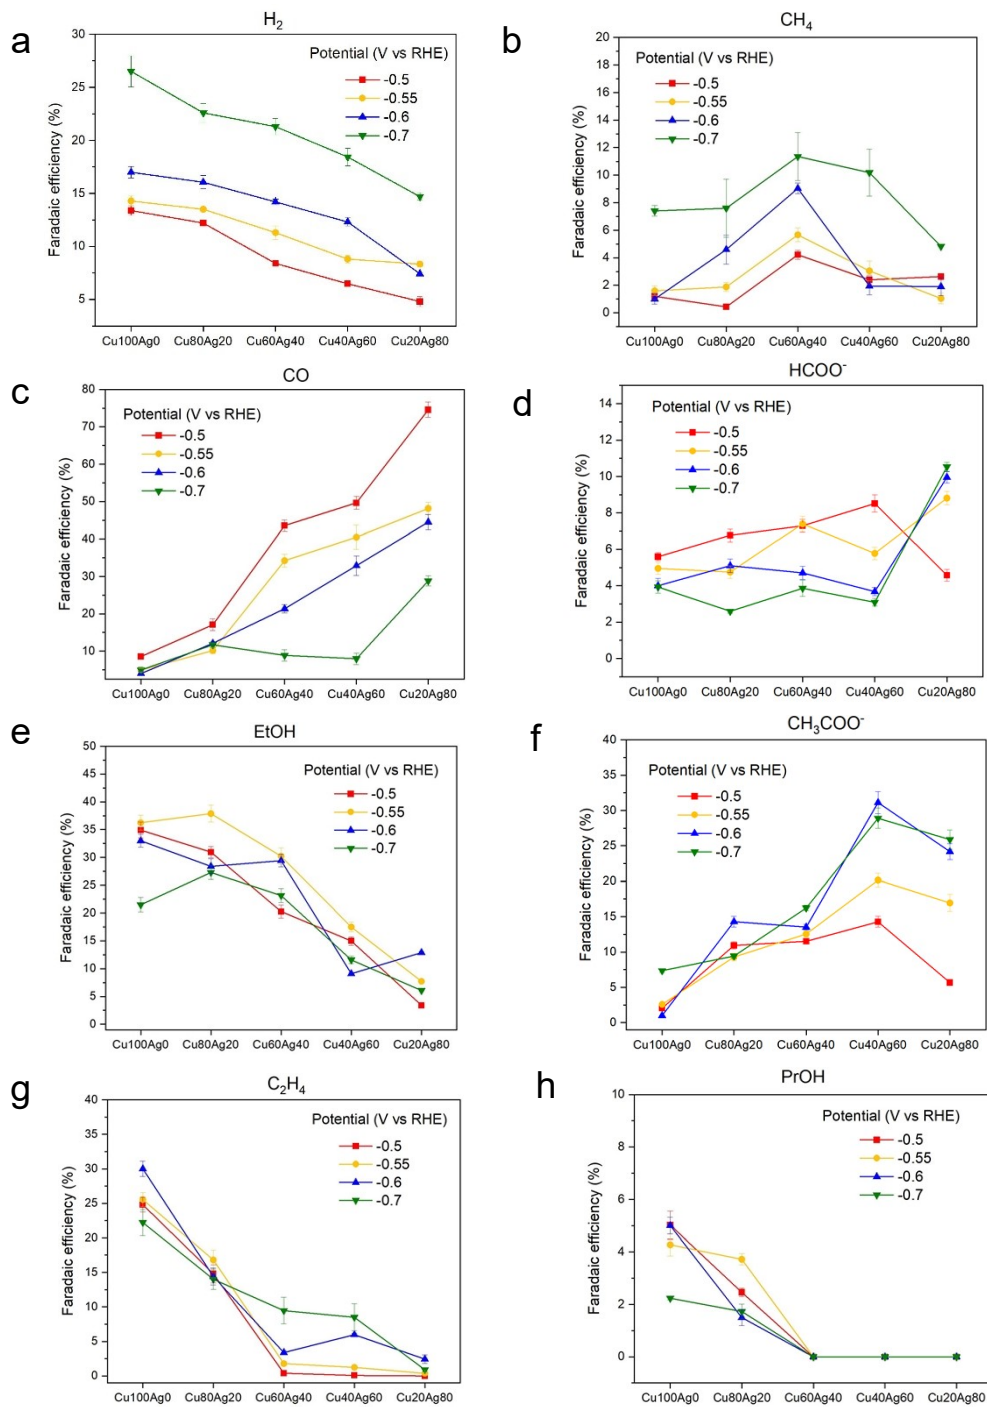

**Figure S20** Faradaic efficiencies of major  $CO_2RR$  products over Cu,  $Cu_{80}Ag_{20}$ ,  $Cu_{60}Ag_{40}$ ,  $Cu_{40}Ag_{60}$ , and  $Cu_{20}Ag_{80}$  catalysts at applied potentials of -0.5 V (red), -0.55 V (yellow), -0.6 V (purple), and -0.7 V (green) vs. RHE.

## References

- [1] M. Serafini, F. Mariani, A. Fasolini, E. Scavetta, F. Basile, D. Tonelli, Nanostructured copper-based electrodes electrochemically synthesized on a carbonaceous gas diffusion membrane with catalytic activity for the electroreduction of CO<sub>2</sub>, *ACS applied materials & interfaces*, 13 (2021) 57451-57461.
- [2] Q. Zhu, X. Sun, D. Yang, J. Ma, X. Kang, L. Zheng, J. Zhang, Z. Wu, B. Han, Carbon dioxide electroreduction to C<sub>2</sub> products over copper-cuprous oxide derived from electrosynthesized copper complex, *Nature communications*, 10 (2019) 3851.
- [3] X.F. Qiu, J.R. Huang, C. Yu, Z.H. Zhao, H.L. Zhu, Z. Ke, P.Q. Liao, X.M. Chen, A stable and conductive covalent organic framework with isolated active sites for highly selective electroreduction of carbon dioxide to acetate, *Angewandte Chemie*, 134 (2022) e202206470.
- [4] S. Gonglach, S. Paul, M. Haas, F. Pillwein, S.S. Sreejith, S. Barman, R. De, S. Müllegger, P. Gerschel, U.-P. Apfel, Molecular cobalt corrole complex for the heterogeneous electrocatalytic reduction of carbon dioxide, *Nature communications*, 10 (2019) 3864.
- [5] Y. Liu, S. Chen, X. Quan, H. Yu, Efficient electrochemical reduction of carbon dioxide to acetate on nitrogen-doped nanodiamond, *Journal of the American Chemical Society*, 137 (2015) 11631-11636.
- [6] H.-L. Zhu, H.-Y. Chen, Y.-X. Han, Z.-H. Zhao, P.-Q. Liao, X.-M. Chen, A porous  $\pi$ - $\pi$  stacking framework with dicopper (I) sites and adjacent proton relays for electroreduction of CO<sub>2</sub> to C<sub>2</sub><sup>+</sup> products, *Journal of the American Chemical Society*, 144 (2022) 13319-13326.
- [7] Z. Cai, N. Cao, F. Zhang, X. Lv, K. Wang, Y. He, Y. Shi, H.B. Wu, P. Xie, Hierarchical Ag-Cu interfaces promote CC coupling in tandem CO<sub>2</sub> electroreduction, *Applied Catalysis B: Environmental*, 325 (2023) 122310.
- [8] L.R.L. Ting, O. Pique, S.Y. Lim, M. Tanhaei, F. Calle-Vallejo, B.S. Yeo, Enhancing CO<sub>2</sub> electroreduction to ethanol on copper-silver composites by opening an alternative catalytic pathway, *ACS catalysis*, 10 (2020) 4059-4069.
- [9] Y. Yu, D. Wang, Y. Hong, T. Zhang, C. Liu, J. Chen, G. Qin, S. Li, Bulk-immiscible CuAg alloy nanorods prepared by phase transition from oxides for electrochemical CO<sub>2</sub> reduction, *Chemical Communications*, 58 (2022) 11163-11166.
- [10] C. Chen, Y. Li, S. Yu, S. Louisia, J. Jin, M. Li, M.B. Ross, P. Yang, Cu-Ag tandem catalysts for high-rate CO<sub>2</sub> electrolysis toward multicarbons, *Joule*, 4 (2020) 1688-1699.
- [11] P. Iyengar, M.J. Kolb, J.R. Pankhurst, F. Calle-Vallejo, R. Buonsanti, Elucidating the facet-dependent selectivity for CO<sub>2</sub> electroreduction to ethanol of Cu-Ag tandem catalysts, *Acs Catalysis*, 11 (2021) 4456-4463.
- [12] X. Lv, L. Shang, S. Zhou, S. Li, Y. Wang, Z. Wang, T.K. Sham, C. Peng, G. Zheng, Electron-deficient Cu sites on Cu<sub>3</sub>Ag<sub>1</sub> catalyst promoting CO<sub>2</sub> electroreduction to alcohols, *Advanced Energy Materials*, 10 (2020) 2001987.
- [13] Z. Feng, C. Hu, H. Tang, K. Shen, L. Chen, Y. Li, Dual-atomic Cu-Ag pairs boosting selective electroreduction of CO<sub>2</sub> to acetate, *Chemical Science*, 16 (2025) 9385-9392.
- [14] C. Choi, J. Cai, C. Lee, H.M. Lee, M. Xu, Y. Huang, Intimate atomic Cu-Ag interfaces for high CO<sub>2</sub>RR selectivity towards CH<sub>4</sub> at low over potential, *Nano Research*, 14 (2021) 3497-3501.
- [15] D. Wei, Y. Wang, C.L. Dong, Z. Zhang, X. Wang, Y.C. Huang, Y. Shi, X. Zhao, J. Wang, R. Long, Decrypting the controlled product selectivity over Ag-Cu bimetallic surface alloys for electrochemical CO<sub>2</sub> reduction, *Angewandte Chemie*, 135 (2023) e202217369.
- [16] Y.C. Li, Z. Wang, T. Yuan, D.-H. Nam, M. Luo, J. Wicks, B. Chen, J. Li, F. Li, F.P.G. De Arquer, Binding site diversity promotes CO<sub>2</sub> electroreduction to ethanol, *Journal of the American Chemical Society*, 141 (2019) 8584-8591.

- [17] M.L. Frisch, L. Wu, C. Atlan, Z. Ren, M. Han, R. Tucoulou, L. Liang, J. Lu, A. Guo, H.N. Nong, Unraveling the synergistic effects of Cu-Ag tandem catalysts during electrochemical CO<sub>2</sub> reduction using nanofocused X-ray probes, *Nature Communications*, 14 (2023) 7833.
- [18] Y. Xu, C. Li, Y. Xiao, C. Wu, Y. Li, Y. Li, J. Han, Q. Liu, J. He, Tuning the selectivity of liquid products of CO<sub>2</sub>RR by Cu–Ag alloying, *ACS Applied Materials & Interfaces*, 14 (2022) 11567-11574.
- [19] S. Zhang, B. Zhang, S. Yang, T. Shao, X. Li, R. Cao, M. Cao, Nanoscale Cu–Ag Heterostructures for CO<sub>2</sub> Reduction to C<sub>2</sub>+ Products, *ACS Applied Nano Materials*, (2025).
- [20] Y. Zhong, X. Kong, Z. Song, Y. Liu, L. Peng, L. Zhang, X. Luo, J. Zeng, Z. Geng, Adjusting local CO confinement in porous-shell Ag@ Cu catalysts for enhancing C–C coupling toward CO<sub>2</sub> eletroreduction, *Nano Letters*, 22 (2022) 2554-2560.
